# Supplementary material for: Epiphitic Microbiome of Alvarinho Wine Grapes from Different Geographic Regions in Portugal
Source: MDPI journal article supplement (doi:10.3390/biology12020146), 2023-01-18
Supplement: s1 [file s1]

## Supplementary material

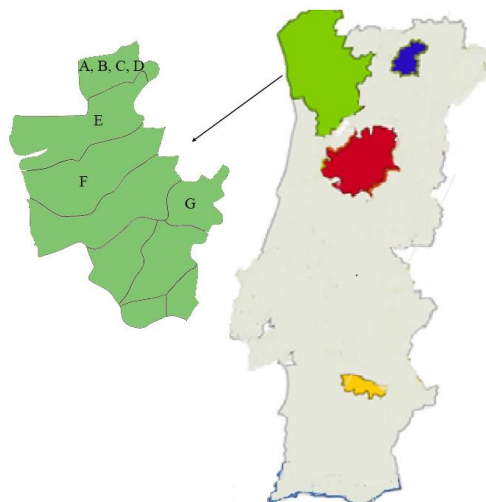

**Figure S1.** Regions (and sub-regions) sampled. Green: Vinho Verde region (Monção & Melgaço, Lima, Cávado, Basto); Blue: Trás-Os-Montes region (Chaves); Red: Dão region Terras de Azurara); Yellow: Alentejo region (Vidigueira). On the left, an ampliation of the Vinho Verde regions with corresponding delimited sub-regions and the location of sampled parcels in this region.

**Table S1.** Summary of  $\alpha$ -diversity significance data (bacteria).

|       |             | Evenness |          | Faith    |          | Observed OTUs |          | Shannon  |          |
|-------|-------------|----------|----------|----------|----------|---------------|----------|----------|----------|
|       |             | p-value  | q-value  | p-value  | q-value  | p-value       | q-value  | p-value  | q-value  |
| Group | Overall     | 0.283912 | –        | 0.704688 | –        | 0.688853      | –        | 0.815017 | –        |
|       | MM vs VV    | 0.288844 | 0.433267 | 0.723674 | 0.723674 | 0.479500      | 0.719250 | 0.723674 | 0.827259 |
|       | MM vs Other | 0.157299 | 0.433267 | 0.479500 | 0.723674 | 0.479500      | 0.719250 | 0.479500 | 0.827259 |
|       | VV vs Other | 0.512691 | 0.512691 | 0.512691 | 0.723674 | 0.827259      | 0.827259 | 0.827259 | 0.827259 |

**Table S2.** Summary of  $\alpha$ -diversity significance data (fungi)

|       |             | Evenness |          | Observed OTUs |          | Shannon  |          |
|-------|-------------|----------|----------|---------------|----------|----------|----------|
|       |             | p-value  | q-value  | p-value       | q-value  | p-value  | q-value  |
| Group | Overall     | 0.785913 | –        | 0.059573      | –        | 0.688853 | –        |
|       | MM vs VV    | 0.479500 | 0.827259 | 0.030754      | 0.092261 | 0.479500 | 0.719250 |
|       | MM vs Other | 0.723674 | 0.827259 | 0.074462      | 0.111693 | 0.479500 | 0.719250 |
|       | VV vs Other | 0.827259 | 0.827259 | 0.824778      | 0.824778 | 0.827259 | 0.827259 |

**Table S3.** Summary of  $\alpha$ -diversity significance data (bacteria)

|       |             | Bray-Curtis |         | Jaccard |         | Weighted-Unifrac |         | Unweighted-Unifrac |         |
|-------|-------------|-------------|---------|---------|---------|------------------|---------|--------------------|---------|
|       |             | p-value     | q-value | p-value | q-value | p-value          | q-value | p-value            | q-value |
| Group | Overall     | 0.939       | –       | 0.882   | –       | 0.905            | –       | 0.929              | –       |
|       | MM vs VV    | 0.682       | 1.0     | 0.569   | 0.908   | 0.800            | 0.943   | 0.978              | 0.978   |
|       | MM vs Other | 1.0         | 1.0     | 0.908   | 0.908   | 0.943            | 0.943   | 0.722              | 0.978   |
|       | VV vs Other | 0.911       | 1.0     | 0.702   | 0.908   | 0.693            | 0.943   | 0.804              | 0.978   |

**Table S4.** Summary of  $\alpha$ -diversity significance data (fungi)

|       |             | Bray-Curtis |         | Jaccard |         |
|-------|-------------|-------------|---------|---------|---------|
|       |             | p-value     | q-value | p-value | q-value |
| Group | Overall     | 0.502       | –       | 0.608   | –       |
|       | MM vs VV    | 0.707       | 0.913   | 0.673   | 0.796   |
|       | MM vs Other | 0.213       | 0.639   | 0.523   | 0.796   |
|       | VV vs Other | 0.913       | 0.913   | 0.796   | 0.796   |
